# Supplementary material for: All-small-molecule organic solar cells based on an electron donor incorporating binary electron-deficient units
Source: Royal Society of Chemistry journal article supplement (doi:10.1039/c5ta10430k), 2016-01-01
Supplement: c5ta10430k1.pdf [file c5ta10430k1.pdf]

## Supporting Information

### All small molecule organic solar cells based on an electron donor incorporating binary electron-deficient units

Guitao Feng,<sup>a,b</sup> Yunhua Xu,<sup>\*a</sup> Jianqi Zhang,<sup>c</sup> Zhaowei Wang,<sup>d</sup> Yi Zhou,<sup>d</sup> Zhixiang Wei,<sup>c</sup> Yongfang Li,<sup>d</sup> Cheng Li<sup>\*b</sup> and Weiwei Li<sup>\*b</sup>

<sup>a</sup> *Department of Chemistry, School of Science, Beijing Jiaotong University, Beijing 100044, China. yhxu@bjtu.edu.cn.*

<sup>b</sup> *Beijing National Laboratory for Molecular Sciences, CAS Key Laboratory of Organic Solids, Institute of Chemistry, Chinese Academy of Sciences, Beijing 100190, P. R. China. E-mail: licheng1987@iccas.ac.cn, liweiwei@iccas.ac.cn*

<sup>c</sup> *National Center for Nanoscience and Technology, Chinese Academy of Sciences, Beijing 100190, China.*

<sup>d</sup> *Laboratory of Advanced Optoelectronic Materials, College of Chemistry, Chemical Engineering and Materials Science, Soochow University, Suzhou, Jiangsu 215123, China*

#### Contents

1. Absorption spectra of PCLDPP in solution and thin films
2. Cyclic voltammetry
3. DFT calculations
4. AFM of PCLDPP thin films
5. Solar cells of PCLDPP:PCBM
6. Solar cells of PCLDPP:SdiPBI
7. Solar cells of PCLDPP:SdiPBI-S
8. FETs based on pure and blended thin films.
9. Photoluminescence spectra of pure molecular thin films
10. 2D-GIWAXS patterns of PCLDPP, SdiPBI and SdiPBI-S thin films

## 1. Absorption spectra of PCLDPP in solution and thin films

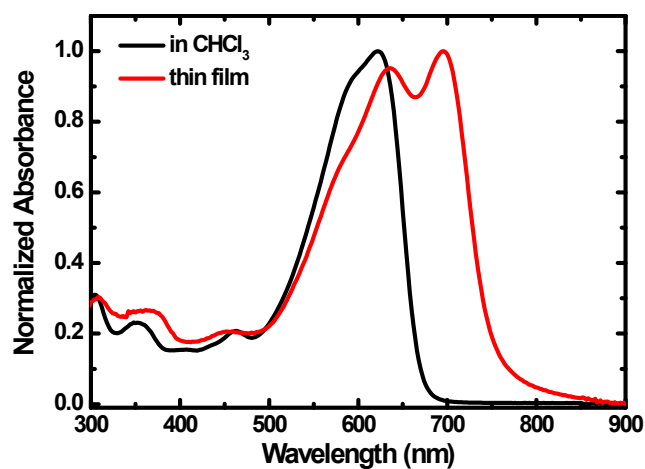

**Fig. S1** Absorption spectra of the molecular PCLDPP in CHCl<sub>3</sub> solution and solid state films. The absorption onset of PCLDPP in CHCl<sub>3</sub> solution is 675 nm with  $E_g^{\text{CHCl}_3} = 1.84$  eV.

## 2. Cyclic voltammetry

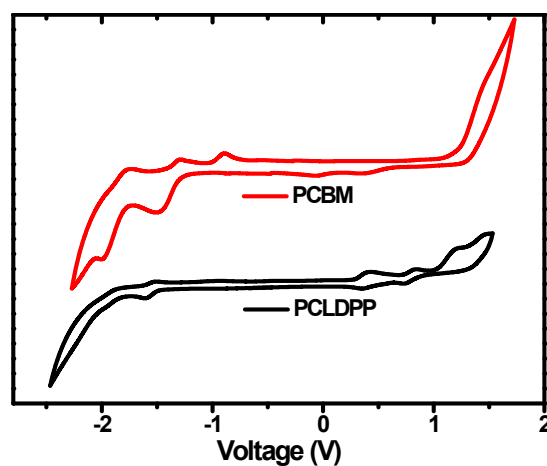

**Fig. S2** Cyclic voltammogram of the molecular PCLDPP and PCBM in CH<sub>2</sub>Cl<sub>2</sub>. Potential vs. Fc/Fc<sup>+</sup>.

## 3. DFT calculations

Density function theory (DFT) calculations were performed at the B3LYP/6-31G\* level of theory by using the Gaussian 09 program package.

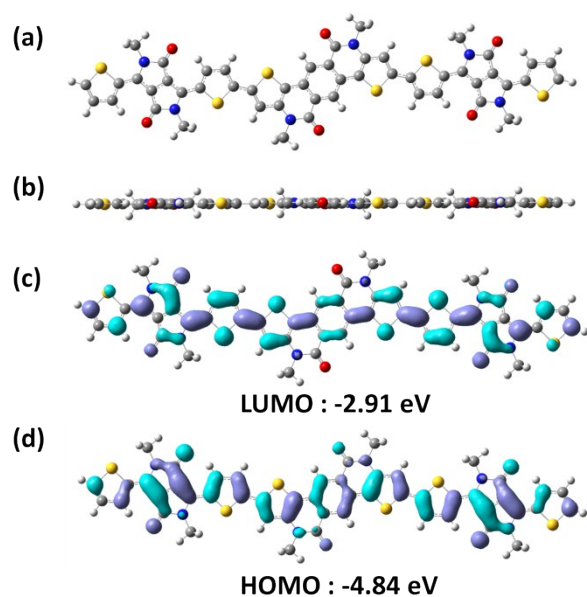

**Fig. S3** DFT calculations of the DPP-PCL-DPP segment. (a) Front view and (b) side view of the optimized molecular geometry. (c) and (d) Frontier molecular orbitals.

#### 4. AFM of PCLDPP thin films

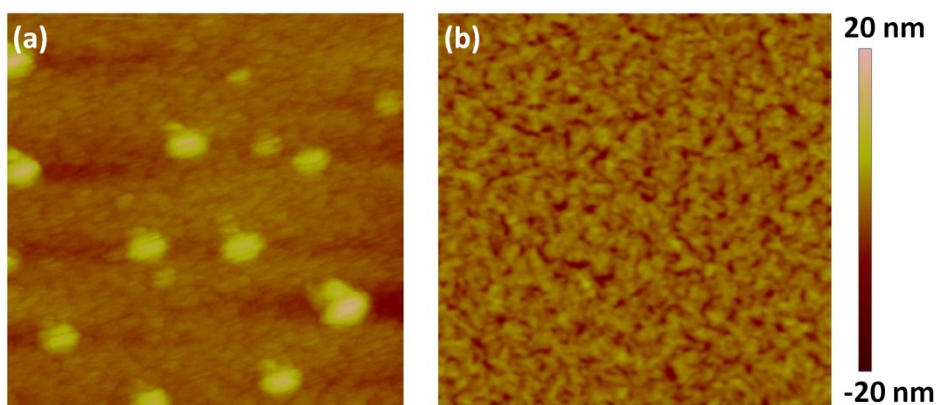

**Fig. S4** AFM height image of PCLDPP thin films on Si substrate (a) without and (b) with thermal annealing at 80 °C. The root mean square (RMS) roughness values of (a) and (b) are 1.00 nm and 2.02 nm.

#### 5. Solar cells of PCLDPP:PCBM

**Table S1.** Characteristics of PCLDPP:PCBM (1:1) solar cells fabricated from chloroform without or with different content of DIO as additive.

| Solvent | Thickness | $J_{sc}^a$ | $V_{oc}$ | FF | PCE <sup>a</sup> |
|---------|-----------|------------|----------|----|------------------|
|---------|-----------|------------|----------|----|------------------|

|                             | (nm) | (mA/cm <sup>2</sup> ) | (V)  | (%)  |     |
|-----------------------------|------|-----------------------|------|------|-----|
| CHCl <sub>3</sub>           | 100  | 3.7                   | 0.84 | 0.55 | 1.7 |
| CHCl <sub>3</sub> :0.2% DIO | 100  | 5.6                   | 0.86 | 0.56 | 2.7 |
| CHCl <sub>3</sub> :0.5% DIO | 95   | 9.7                   | 0.89 | 0.56 | 4.8 |
| CHCl <sub>3</sub> :1% DIO   | 90   | 8                     | 0.89 | 0.50 | 3.6 |
| CHCl <sub>3</sub> :2.5% DIO | 100  | 9.9                   | 0.88 | 0.51 | 4.5 |
| CHCl <sub>3</sub> :4% DIO   | 100  | 8.2                   | 0.86 | 0.49 | 3.5 |

<sup>a</sup>  $J_{sc}$  as calculated by integrating the EQE spectrum with the AM1.5 G spectrum.

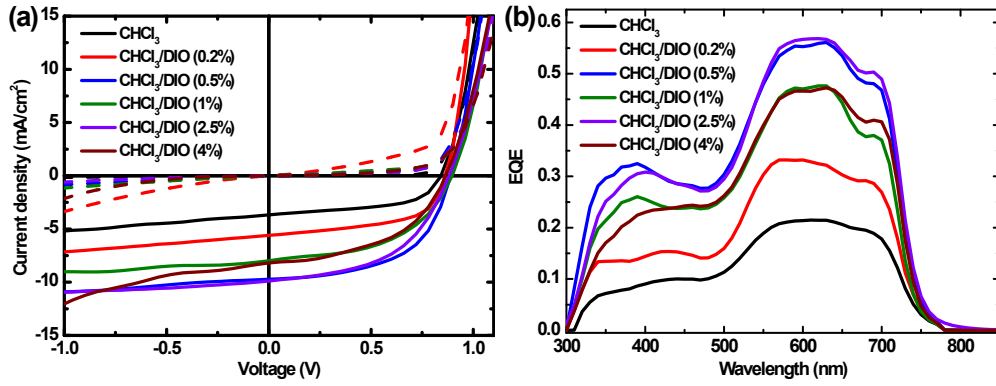

**Fig. S5** (a)  $J$ - $V$  characteristics under white light illumination and (b) EQE of the PCLDPP:PCBM (1:1) solar cells fabricated from CHCl<sub>3</sub> without or with different content of DIO as additive.

**Table S2.** Characteristics of PCLDPP:PCBM solar cells fabricated from CHCl<sub>3</sub>/DIO (2%) with different ratio of donor to acceptor.

| Ratio | Thickness (nm) | $J_{sc}^a$ (mA/cm <sup>2</sup> ) | $V_{oc}$ (V) | FF   | PCE <sup>a</sup> (%) |
|-------|----------------|----------------------------------|--------------|------|----------------------|
| 2:1   | 120            | 9.6                              | 0.88         | 0.50 | 4.2                  |
| 1:1   | 95             | 9.7                              | 0.89         | 0.56 | 4.8                  |
| 1:2   | 110            | 7.8                              | 0.88         | 0.54 | 3.7                  |
| 1:3   | 100            | 6.4                              | 0.87         | 0.54 | 3.0                  |

<sup>a</sup>  $J_{sc}$  as calculated by integrating the EQE spectrum with the AM1.5 G spectrum.

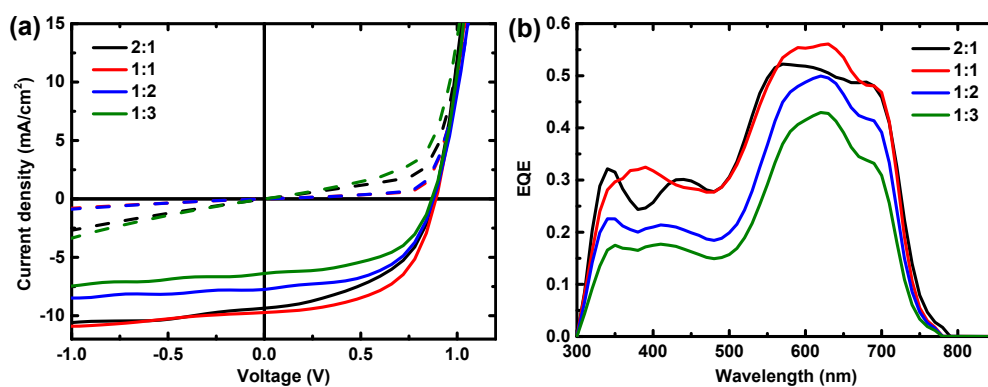

**Fig. S6** (a)  $J$ - $V$  characteristic under white light illumination and (b) EQE of the PCLDPP:PCBM solar cells fabricated from  $\text{CHCl}_3$ /DIO (0.5%) with different ratio of donor to acceptor.

**Table S3.** Characteristics of PCLDPP:PCBM (1:1) solar cells fabricated from  $\text{CHCl}_3$ /DIO (0.5%) with different thickness of active layers.

| Thickness<br>(nm) | $J_{sc}^a$<br>(mA/cm <sup>2</sup> ) | $V_{oc}$<br>(V) | FF   | PCE <sup>a</sup><br>(%) |
|-------------------|-------------------------------------|-----------------|------|-------------------------|
| 75                | 7.7                                 | 0.87            | 0.59 | 3.9                     |
| 95                | 9.7                                 | 0.89            | 0.56 | 4.8                     |
| 110               | 9.0                                 | 0.88            | 0.58 | 4.7                     |
| 140               | 9.4                                 | 0.88            | 0.56 | 4.6                     |

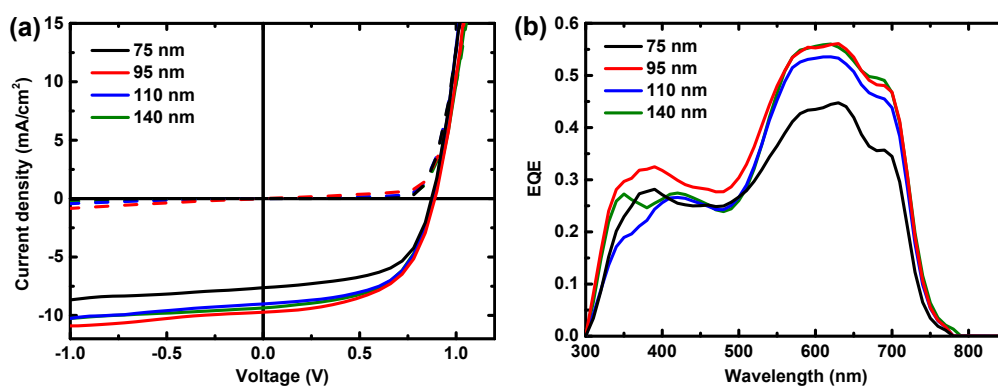

**Fig. S7** (a)  $J$ - $V$  characteristic under white light illumination and (b) EQE of the PCLDPP:PCBM (1:1) solar cells fabricated from  $\text{CHCl}_3$ /DIO (0.5%) with the different thickness.

## 6. Solar cells of PCLDPP:SdiPBI

**Table S4.** Characteristics of PCLDPP:SdiPBI (1:1) solar cells fabricated from chloroform with different content of DIO as additive.

| Solvent                       | Thickness (nm) | $J_{sc}^a$ (mA/cm <sup>2</sup> ) | $V_{oc}$ (V) | FF   | PCE <sup>a</sup> (%) |
|-------------------------------|----------------|----------------------------------|--------------|------|----------------------|
| CHCl <sub>3</sub> /DIO (0.2%) | 110            | 5.0                              | 0.91         | 0.37 | 1.7                  |
| CHCl <sub>3</sub> /DIO (0.5%) | 100            | 5.2                              | 0.94         | 0.35 | 1.7                  |
| CHCl <sub>3</sub> /DIO (1%)   | 105            | 5.0                              | 0.94         | 0.49 | 1.8                  |

<sup>a</sup>  $J_{sc}$  as calculated by integrating the EQE spectrum with the AM1.5 G spectrum.

When using chloroform without additive or increasing DIO content to 2.5%, the devices performed large leakage current with very low PCE.

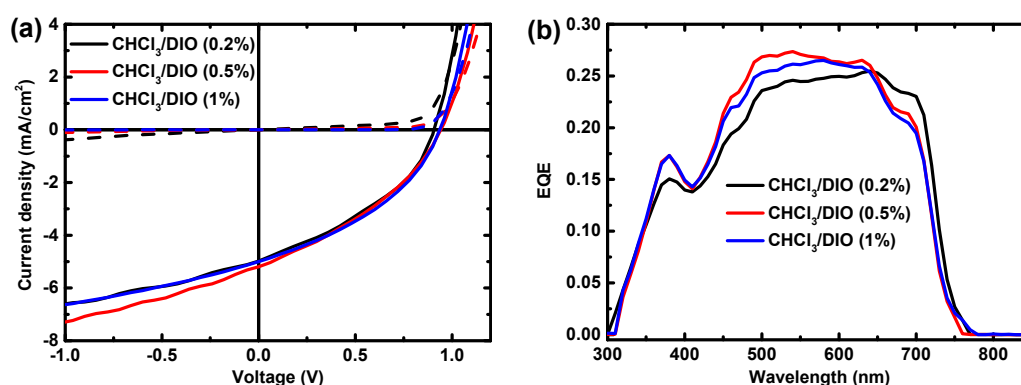

**Fig. S8** (a)  $J$ - $V$  characteristics under white light illumination and (b) EQE of the PCLDPP:SdiPBI (1:1) solar cells fabricated from CHCl<sub>3</sub> with different content of DIO as additive.

**Table S5.** Characteristics of PCLDPP:SdiPBI solar cells fabricated from CHCl<sub>3</sub>/DIO (1%) with different ratio of donor to acceptor.

| Ratio | Thickness (nm) | $J_{sc}^a$ (mA/cm <sup>2</sup> ) | $V_{oc}$ (V) | FF   | PCE <sup>a</sup> (%) |
|-------|----------------|----------------------------------|--------------|------|----------------------|
| 3:1   | 95             | 4.8                              | 0.90         | 0.39 | 1.7                  |
| 2:1   | 120            | 6.1                              | 0.92         | 0.42 | 2.4                  |
| 1:1   | 105            | 5.0                              | 0.94         | 0.49 | 1.8                  |
| 1:2   | 120            | 4.1                              | 0.94         | 0.32 | 1.2                  |

<sup>a</sup>  $J_{sc}$  as calculated by integrating the EQE spectrum with the AM1.5 G spectrum.

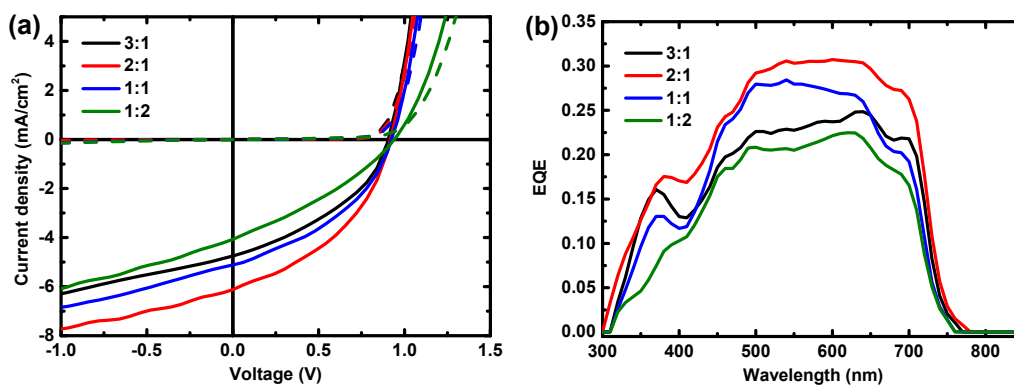

**Fig. S9** (a)  $J$ - $V$  characteristic under white light illumination and (b) EQE of the PCLDPP:SdiPBI solar cells fabricated from  $\text{CHCl}_3$ /DIO (1%) with different ratio of donor to acceptor.

**Table S6.** Characteristics of PCLDPP:SdiPBI (2:1) solar cells fabricated from  $\text{CHCl}_3$ /DIO (1%) with different thickness of active layers.

| Thickness<br>(nm) | $J_{sc}^a$<br>(mA/cm <sup>2</sup> ) | $V_{oc}$<br>(V) | FF   | PCE <sup>a</sup><br>(%) |
|-------------------|-------------------------------------|-----------------|------|-------------------------|
| 70                | 4.0                                 | 0.91            | 0.43 | 1.6                     |
| 90                | 4.9                                 | 0.91            | 0.40 | 1.8                     |
| 120               | 6.1                                 | 0.92            | 0.42 | 2.4                     |
| 160               | 5.4                                 | 0.91            | 0.37 | 1.8                     |

<sup>a</sup>  $J_{sc}$  as calculated by integrating the EQE spectrum with the AM1.5 G spectrum.

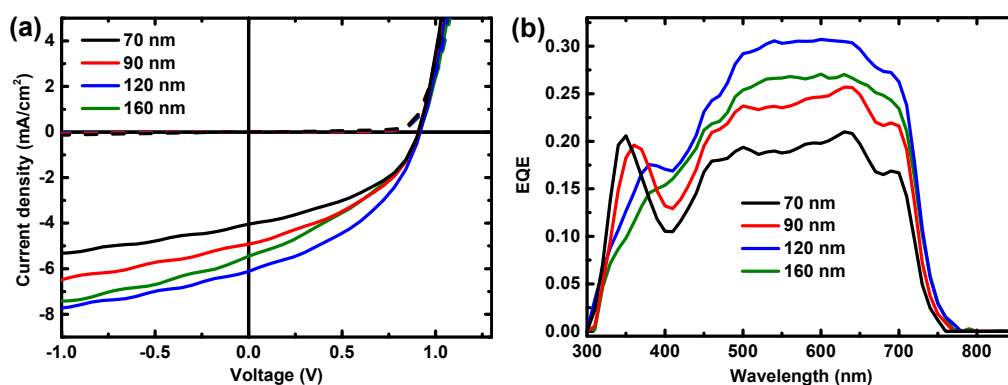

**Fig. S10** (a)  $J$ - $V$  characteristic under white light illumination and (b) EQE of the PCLDPP:SDiPBI (2:1) solar cells fabricated from  $\text{CHCl}_3$ /DIO (1%) with the different thickness.

## 7. Solar cells of PCLDPP:SdiPBI-S

**Table S7.** Characteristics of PCLDPP:SdiPBI-S (1:1) solar cells fabricated from chloroform with different content of DIO as additive.

| Solvent                       | Thickness (nm) | $J_{sc}^a$ (mA/cm <sup>2</sup> ) | $V_{oc}$ (V) | FF   | PCE <sup>a</sup> (%) |
|-------------------------------|----------------|----------------------------------|--------------|------|----------------------|
| CHCl <sub>3</sub> /DIO (0.2%) | 90             | 5.3                              | 0.98         | 0.30 | 1.6                  |
| CHCl <sub>3</sub> /DIO (0.5%) | 120            | 7.6                              | 0.98         | 0.42 | 3.1                  |
| CHCl <sub>3</sub> /DIO (1%)   | 120            | 6.7                              | 0.96         | 0.53 | 3.5                  |

<sup>a</sup>  $J_{sc}$  as calculated by integrating the EQE spectrum with the AM1.5 G spectrum.

When using chloroform without additive or increasing DIO content to 2.5%, the devices performed large leakage current with very low PCE.

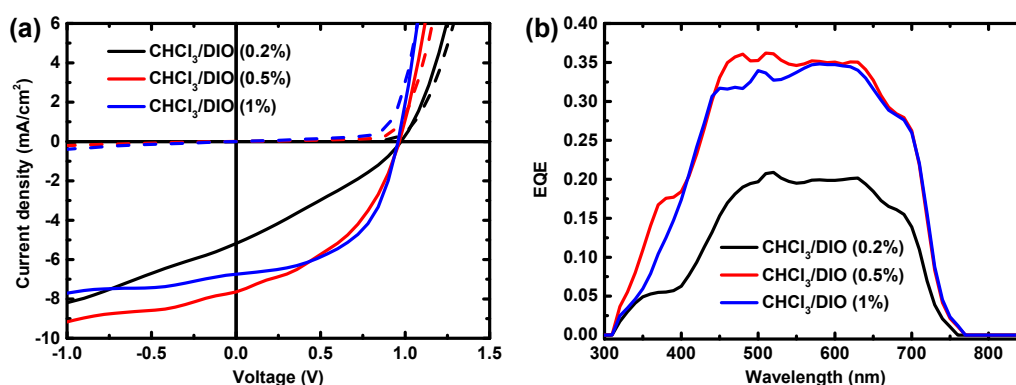

**Fig. S11** (a)  $J$ - $V$  characteristics under white light illumination and (b) EQE of the PCLDPP:SdiPBI-S (1:1) solar cells fabricated from CHCl<sub>3</sub> with different content of DIO as additive.

**Table S8.** Characteristics of PCLDPP:SdiPBI-S solar cells fabricated from CHCl<sub>3</sub>/DIO (1%) with different ratio of donor to acceptor.

| Ratio | Thickness (nm) | $J_{sc}^a$ (mA/cm <sup>2</sup> ) | $V_{oc}$ (V) | FF   | PCE <sup>a</sup> (%) |
|-------|----------------|----------------------------------|--------------|------|----------------------|
| 2:1   | 110            | 5.3                              | 0.95         | 0.54 | 2.8                  |
| 1:1   | 120            | 6.7                              | 0.96         | 0.53 | 3.5                  |
| 1:2   | 110            | 6.3                              | 0.96         | 0.48 | 2.9                  |

<sup>a</sup>  $J_{sc}$  as calculated by integrating the EQE spectrum with the AM1.5 G spectrum.



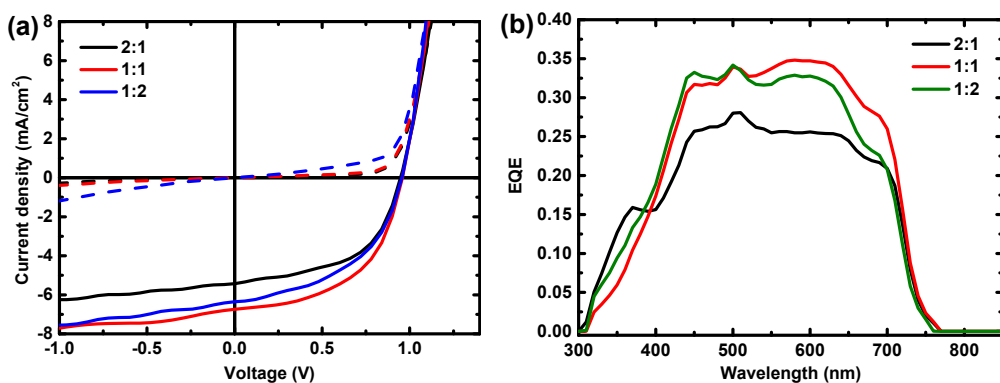

**Fig. S12** (a)  $J$ - $V$  characteristic under white light illumination and (b) EQE of the PCLDPP:SdiPBI-S solar cells fabricated from  $\text{CHCl}_3$ /DIO (1%) with different ratio of donor to acceptor.

**Table S9.** Characteristics of PCLDPP:SdiPBI-S (1:1) solar cells fabricated from  $\text{CHCl}_3$ /DIO (1%) with different thickness of active layers.

| Thickness<br>(nm) | $J_{sc}^a$<br>(mA/cm <sup>2</sup> ) | $V_{oc}$<br>(V) | FF   | PCE <sup>a</sup><br>(%) |
|-------------------|-------------------------------------|-----------------|------|-------------------------|
| 90                | 6.1                                 | 0.96            | 0.45 | 3.2                     |
| 100               | 6.6                                 | 0.95            | 0.53 | 3.3                     |
| 120               | 6.7                                 | 0.96            | 0.53 | 3.5                     |
| 160               | 6.7                                 | 0.94            | 0.49 | 3.1                     |

<sup>a</sup>  $J_{sc}$  as calculated by integrating the EQE spectrum with the AM1.5 G spectrum.

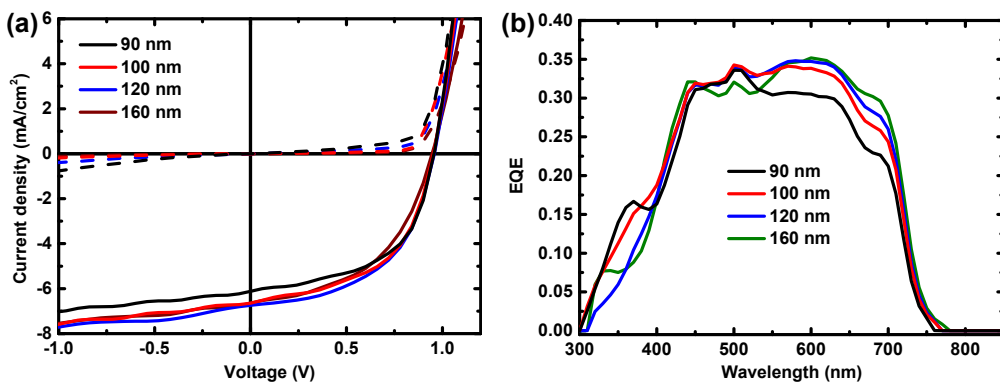

**Fig. S13** (a)  $J$ - $V$  characteristic under white light illumination and (b) EQE of the PCLDPP:SdiPBI-S (1:1) solar cells fabricated from  $\text{CHCl}_3$ /DIO (1%) with the different thickness.

## 8. FETs based on pure and blended thin films.

**Table S10.** Field effect hole mobilities of PCLDPP and blended thin films in a BGBC configuration.

|                 | Annealing temp | $\mu_{\text{h}}$<br>[ $\text{cm}^2 \text{V}^{-1} \text{s}^{-1}$ ] | $V_{\text{T}}$<br>[V] | $I_{\text{on}}/I_{\text{off}}$ |
|-----------------|----------------|-------------------------------------------------------------------|-----------------------|--------------------------------|
| PCLDPP          | 80 °C          | $2.6 \times 10^{-2}$                                              | -8.8                  | $2.7 \times 10^8$              |
| PCLDPP:PCBM     | 130 °C         | $1.0 \times 10^{-1}$                                              | -15.1                 | $8.2 \times 10^4$              |
| PCLDPP:SdiPBI   | 130 °C         | $4.9 \times 10^{-2}$                                              | -31.3                 | $3.6 \times 10^4$              |
| PCLDPP:SdiPBI-S | 80 °C          | $2.0 \times 10^{-2}$                                              | -23.6                 | $1.8 \times 10^3$              |

## 9. Photoluminescence spectra of pure molecular thin films

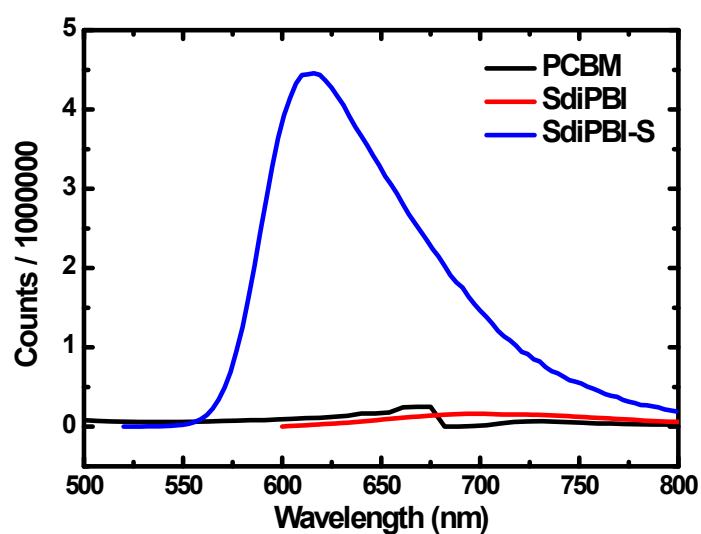

**Fig. S14** Photoluminescence spectra of the electron acceptor thin films. The excitation wavelength is 400 nm, 530 nm and 504 nm for PCBM, SdiPBI and SdiPBI-S.

## 10. 2D-GIWAXS patterns of PCLDPP, SdiPBI and SdiPBI-S thin films

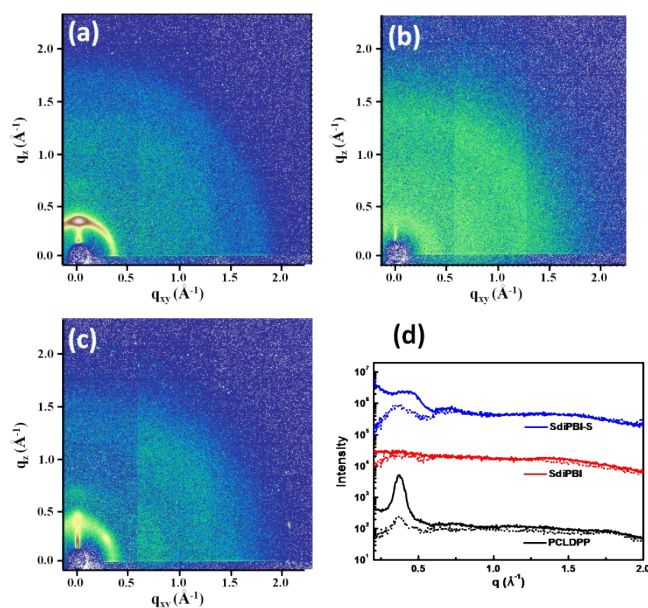

**Fig. S15** Characteristics of the (a) PCLDPP, (b) SdiPBI and (c) SdiPBI-S fabricated from CHCl<sub>3</sub>. (a) – (c) 2D-GIWAXS patterns, and (d) the out-of plane (solid lines) and in-plane (dash lines) of the corresponding 2D-GIWAXS patterns.
